# Supplementary material
Source: MDPI journal article supplement (https://www.mdpi.com/2073-4441/16/1/64)

Table S1: The specific physicochemical characteristics of the sampled wastewater effluent of the three facilities during this study: acidity/basicity (pH, pH units); electrical conductivity (EC,  $\mu\text{S}/\text{cm}$ ); temperature (T,  $^{\circ}\text{C}$ ); suspended solids (SSs,  $\text{mg}/\text{L}$ ); chemical oxygen demand (COD,  $\text{mg}/\text{L}$ ); total nitrogen (TN,  $\text{mg}/\text{L}$ ); and total phosphorus (P-PO<sub>4</sub>,  $\text{mg}/\text{L}$ ).

| Date             | pH   | CE      | T    | SS     | COD   | TN     | P-PO <sub>4</sub> |
|------------------|------|---------|------|--------|-------|--------|-------------------|
| <b>PRET WWTP</b> |      |         |      |        |       |        |                   |
| <b>Jun.-22</b>   | 7,75 | 8210    | 24,3 | 203,30 | 337,0 | 145,2  | 11,86             |
| <b>Jul.-22</b>   | 7,12 | 3950    | 24,6 | 198,00 | 679,0 | 120,4  | 12,62             |
| <b>Aug.-22</b>   | 7,32 | 8020    | 22,6 | 300,00 | 396,0 | 81,6   | 9,42              |
| <b>Sep.-22</b>   | 7,21 | 7130    | 24,6 | 342,50 | 918,0 | 123,2  | 13,05             |
| <b>Oct.-22</b>   | 7,29 | 6400    | 24,1 | 70,70  | 404,0 | 52,8   | 9,68              |
| <b>Nov.-22</b>   | 7,47 | 6920    | 24,5 | 139,09 | 482,0 | 77,2   | 16,32             |
| <b>Jan.-23</b>   | 7,24 | 3470    | 17,7 | 290,90 | 564,0 | 71,8   | 7,49              |
| <b>Feb.-23</b>   | 7,31 | 4200    | 21,6 | 491,40 | 757,0 | 91,2   | 7,74              |
| Average          | 7,34 | 6038    | 23,0 | 254,49 | 567,1 | 95,43  | 11,02             |
| SD               | 0,19 | 1892,84 | 2,40 | 131,03 | 202,8 | 31,14  | 3,00              |
| Max              | 7,75 | 8210    | 24,6 | 491,40 | 918,0 | 145,2  | 16,32             |
| Min              | 7,12 | 3470    | 17,7 | 70,70  | 337,0 | 52,8   | 7,49              |
| <b>AS WWTP</b>   |      |         |      |        |       |        |                   |
| <b>Jun.-22</b>   | 7,13 | 1814    | 26,3 | 10,2   | 42,9  | 79,90  | 3,31              |
| <b>Jul.-22</b>   | 6,74 | 1647    | 25,1 | 11,2   | 49,5  | 8,24   | 0,51              |
| <b>Aug.-22</b>   | 7,21 | 2270    | 26,9 | 8,0    | 48,0  | 6,93   | 2,107             |
| <b>Sep.-22</b>   | 7,13 | 1887    | 28,6 | 20,0   | 57,5  | 10,54  | 2,628             |
| <b>Oct.-22</b>   | 7,54 | 2360    | 27,8 | 10,8   | 49,4  | 37,20  | 3,48              |
| <b>Nov.-22</b>   | 7,49 | 2220    | 28,3 | 11,8   | 48,2  | 29,40  | 8,76              |
| <b>Jan.-23</b>   | 6,47 | 1713    | 24,3 | 12,4   | 70,0  | 26,10  | 8,08              |
| <b>Feb.-23</b>   | 7,05 | 1751    | 22,1 | 14,8   | 52,1  | 28,60  | 4,83              |
| Average          | 7,10 | 1958    | 26,2 | 12,4   | 52,2  | 28,36  | 4,21              |
| SD               | 0,36 | 281     | 2,23 | 3,6    | 8,3   | 23,67  | 2,88              |
| Max              | 7,54 | 2360    | 28,6 | 20,0   | 70,0  | 79,9   | 8,76              |
| Min              | 6,47 | 1647    | 22,1 | 8,0    | 42,9  | 6,93   | 0,51              |
| <b>MBR WWTP</b>  |      |         |      |        |       |        |                   |
| <b>Jun.-22</b>   | 7,29 | 1690    | 26,4 | 7,6    | 40,70 | 160,80 | 11,74             |
| <b>Jul.-22</b>   | 6,81 | 1726    | 23,9 | 0,2    | 27,40 | 9,93   | 0,68              |
| <b>Aug.-22</b>   | 6,86 | 1753    | 30,4 | < 2 mg | 27,30 | 8,11   | 2,61              |
| <b>Sep.-22</b>   | 7,43 | 2200    | 28,4 | < 2 mg | 27,20 | 31,40  | 1,35              |
| <b>Oct.-22</b>   | 7,00 | 2010    | 28,0 | < 2mg  | 27,00 | 59,20  | 9,02              |
| <b>Nov.-22</b>   | 6,05 | 1817    | 28,5 | 15,2   | 44,00 | 69,50  | 14,20             |
| <b>Jan.-23</b>   | 7,30 | 1586    | 26,1 | < 2 mg | 37,00 | 12,84  | <0,05             |
| <b>Feb.-23</b>   | 7,37 | 1749    | 23,5 | <2 mg  | 28,90 | 30,30  | 1,92              |
| Average          | 7,01 | 1816    | 26,9 | 7,7    | 32,44 | 47,76  | 5,93              |
| SD               | 0,46 | 197     | 2,38 | 5,64   | 7,01  | 50,96  | 5,58              |
| Max              | 7,43 | 2200    | 30,4 | 15,2   | 44,00 | 160,80 | 14,20             |
| Min              | 6,05 | 1586    | 23,5 | 0,2    | 27,00 | 8,11   | 0,68              |

Figure S1: Median concentrations of MPs (MP·L<sup>-1</sup>) in boxplots for each WWTP effluent subjected to different treatments: A—activated sludge (AS), B—membrane bioreactor (MBR), and C—pretreatment (PRET).

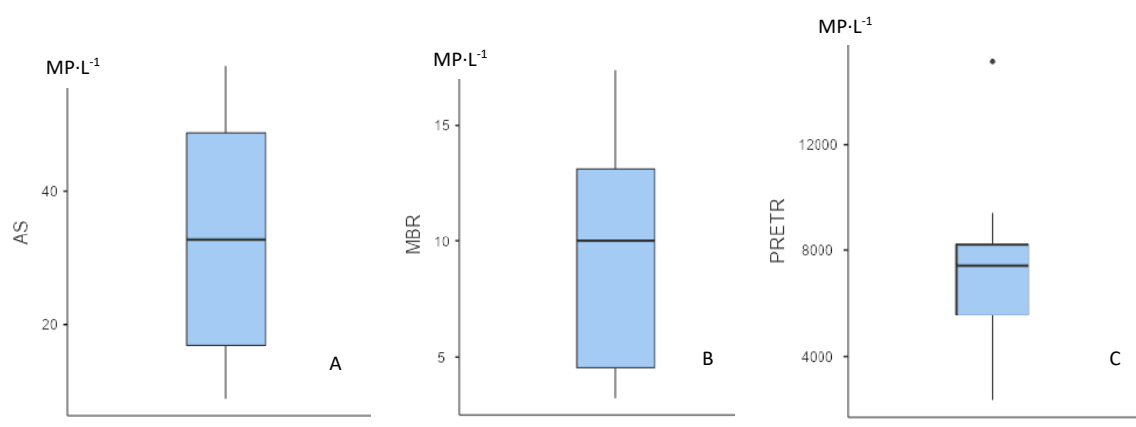

Supplement: s1 [file s1]
